# Supplementary material for: Synthesis of the first amphiphilic pillar[6]arene and its enzyme-responsive self-assembly in water
Source: Royal Society of Chemistry journal article supplement (doi:10.1039/c4cc05621c), 2014-08-15
Supplement: c4cc05621c1.pdf [file c4cc05621c1.pdf]

# Synthesis of the first amphiphilic pillar[6]arene and its enzyme-responsive self-assembly in water

Jun Zhou,<sup>\*1,2</sup> Ming Chen,<sup>1</sup> and Guowang Diao<sup>\*1</sup>

1. College of Chemistry and Chemical Engineering, Yangzhou University, Yangzhou 225002, Jiangsu, China; E-mail: gwdiao@yzu.edu.cn.

2. Department of Chemical and Biological Engineering, Nantong Vocational College, Nantong 226007, Jiangsu, China; E-mail: sczhoujun@126.com.

## Electronic Supplementary Information (16 pages)

|                                                             |     |
|-------------------------------------------------------------|-----|
| 1. Materials and methods                                    | S2  |
| 2. Syntheses of <b>WP5</b> , <b>WP6</b> , and <b>AP6</b>    | S3  |
| 3. Self-assembly of <b>AP6</b> in water                     | S10 |
| 4. Host-guest interaction between <b>ATP</b> and <b>WP6</b> | S11 |
| 5. Self-assembly of <b>AP6</b> ⊃ <b>ATP</b> in water        | S13 |
| 6. References                                               | S16 |

## *1. Materials and methods*

All reagents were commercially available and used as supplied without further purification. Solvents were either employed as purchased or dried according to procedures described in the literature.  $^1\text{H}$  NMR and  $^{13}\text{C}$  HMR spectra were recorded with a Bruker Avance DMX 400 spectrophotometer using the deuterated solvent as the lock and the residual solvent or TMS as the internal reference. Low-resolution electrospray ionization mass spectra were recorded with a Bruker Esquire 3000 Plus spectrometer. High-resolution mass spectrometry experiments were performed with IonSpec 4.7 Tesla FTMS. Transmission electron microscopy investigations were carried out on a JEM-1200EX instrument. Dynamic light scattering was carried out on a Malvern Nanosizer S instrument at room temperature. UV-Vis spectra were taken on a PerkinElmer Lambda 35 UV-vis spectrophotometer.

## 2. Syntheses of **WP5**, **WP6**, and **AP6**

### 2.1 Syntheses of **WP5** and **WP6**

Scheme S1. Syntheses route to **WP5** and **WP6**

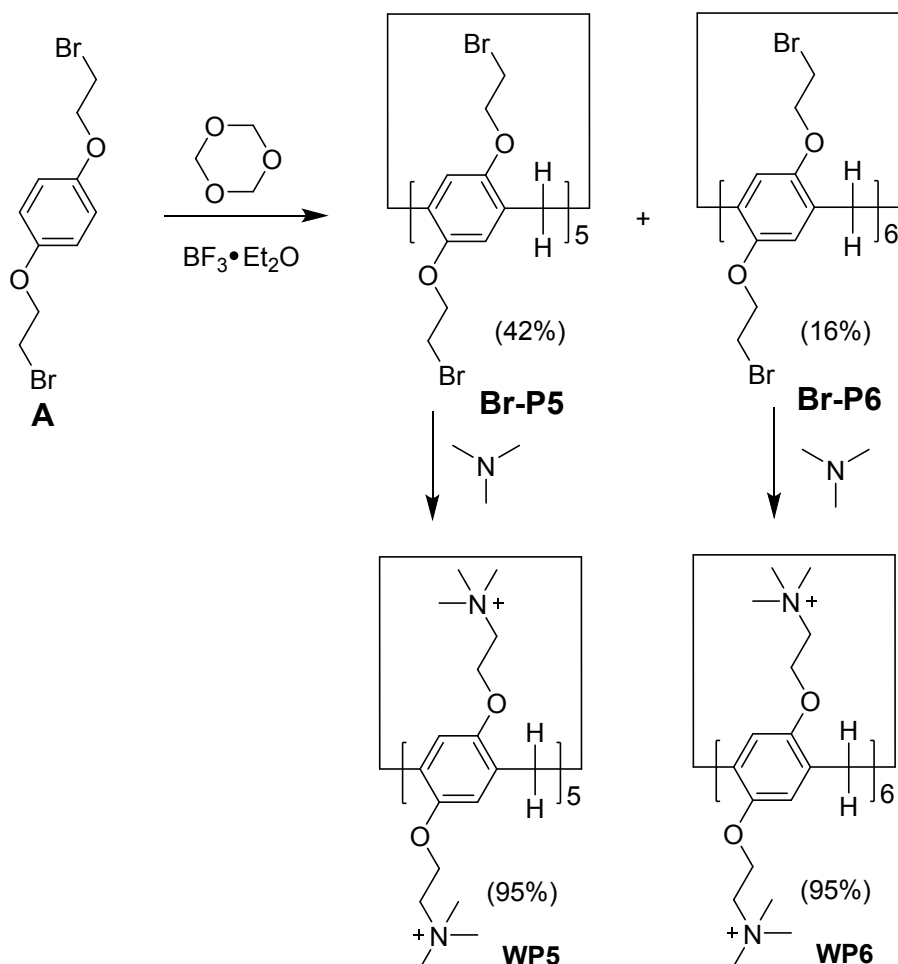

**WP5** and **WP6** were synthesized according previous report.<sup>S1,S2</sup> By condensation of **A** with boron trifluoride etherate as the catalyst in  $\text{ClCH}_2\text{CH}_2\text{Cl}$ , bromomethyl substituted pillar[n]arene **Br-P5** and **Br-P6** were synthesized. Then **WP5** and **WP6** were obtained by refluxing a solution of **Br-P5** or **Br-P6** with trimethylamine in toluene. The  $^1\text{H}$  NMR spectra of **Br-P5**, **Br-P6**, **WP5**, and **WP6** were shown in Fig. S1–Fig.S4, which were the same as the previous reports.

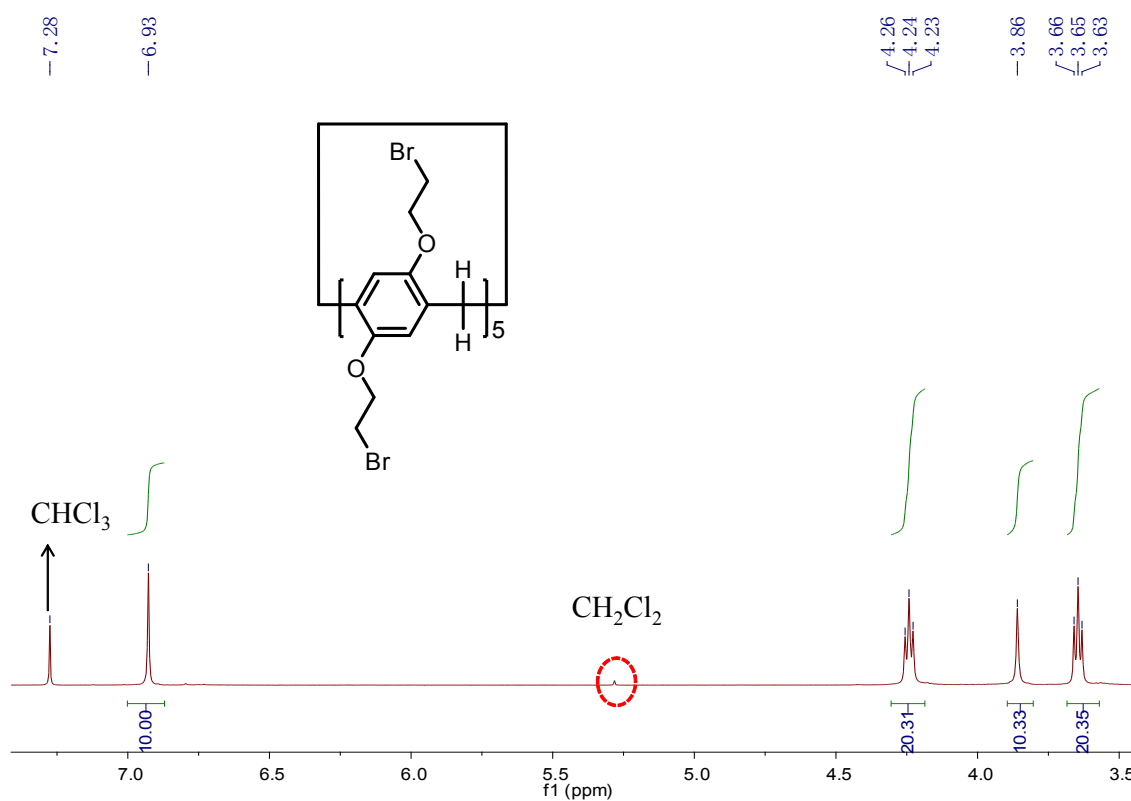

**Fig. S1**  $^1\text{H}$  NMR spectrum (400 MHz,  $\text{CDCl}_3$ , rt) of **Br-P5**.

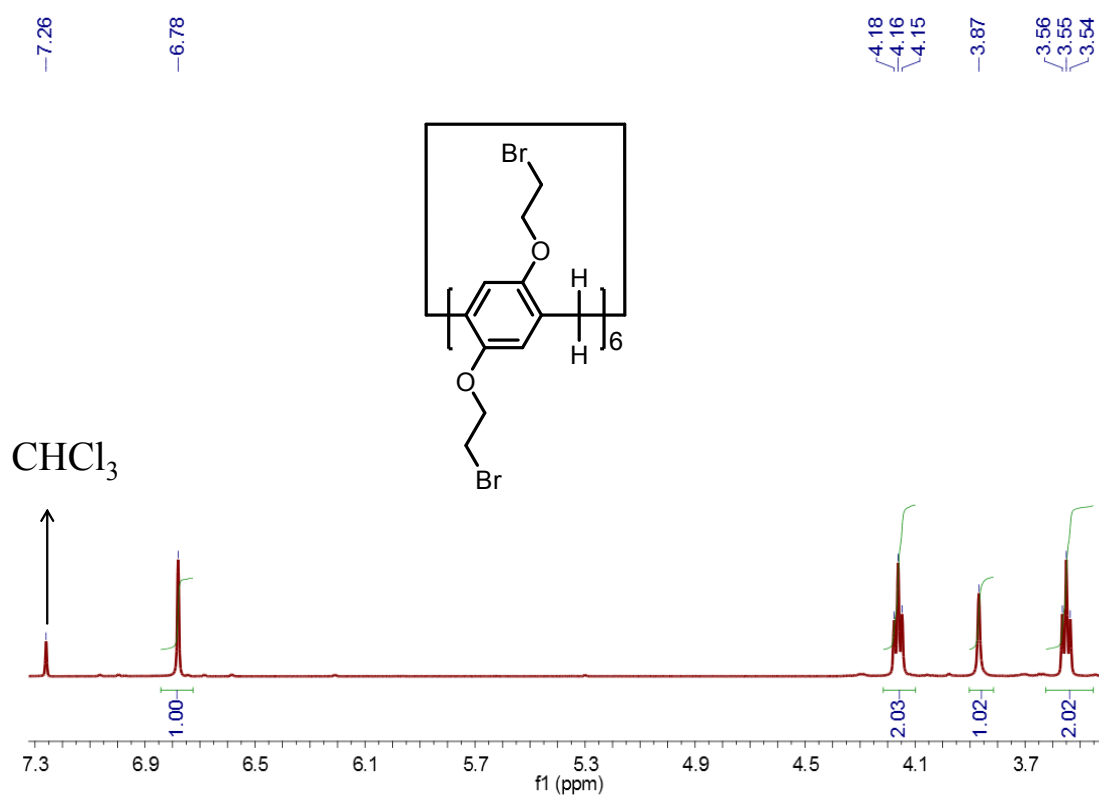

**Fig. S2**  $^1\text{H}$  NMR spectrum (400 MHz,  $\text{CDCl}_3$ , rt) of **Br-P6**.

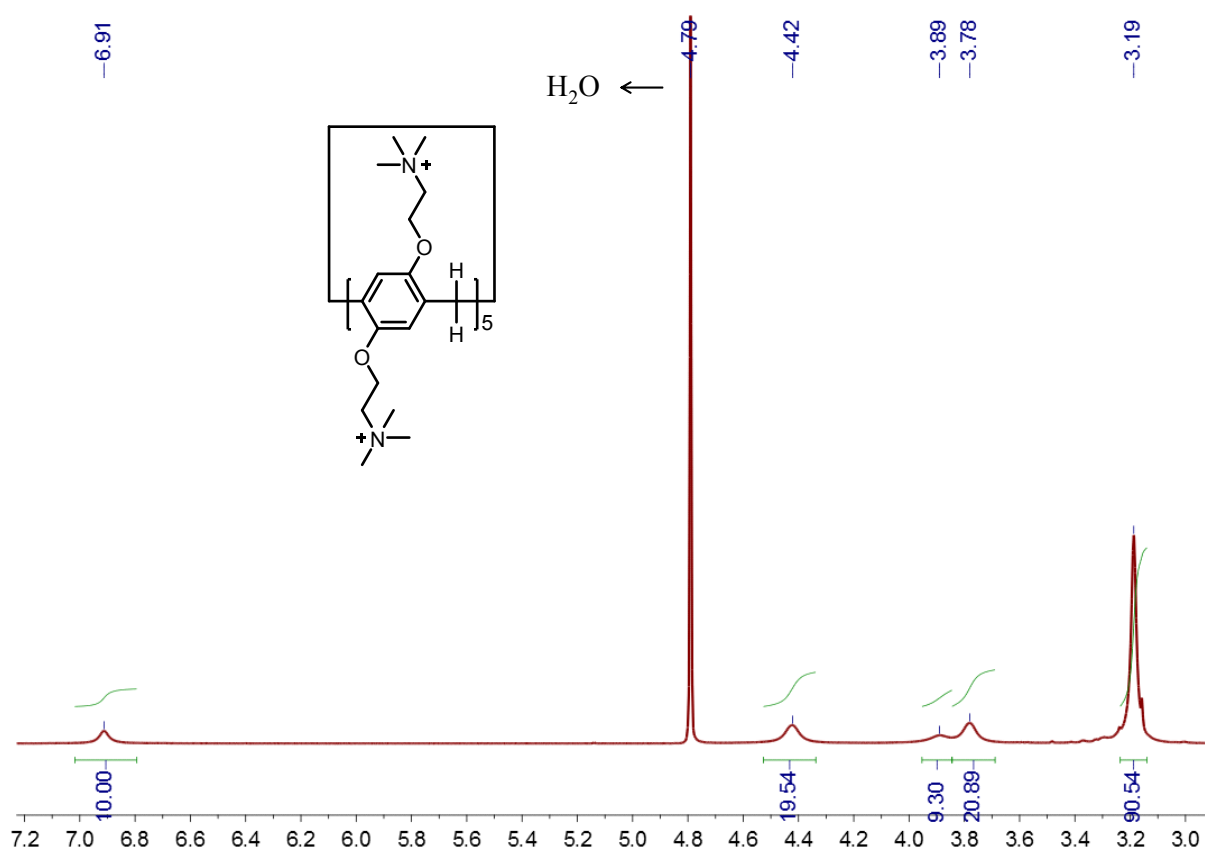

**Fig. S3**  $^1\text{H}$  NMR spectrum (400 MHz,  $\text{CDCl}_3$ , rt) of **WP5**.

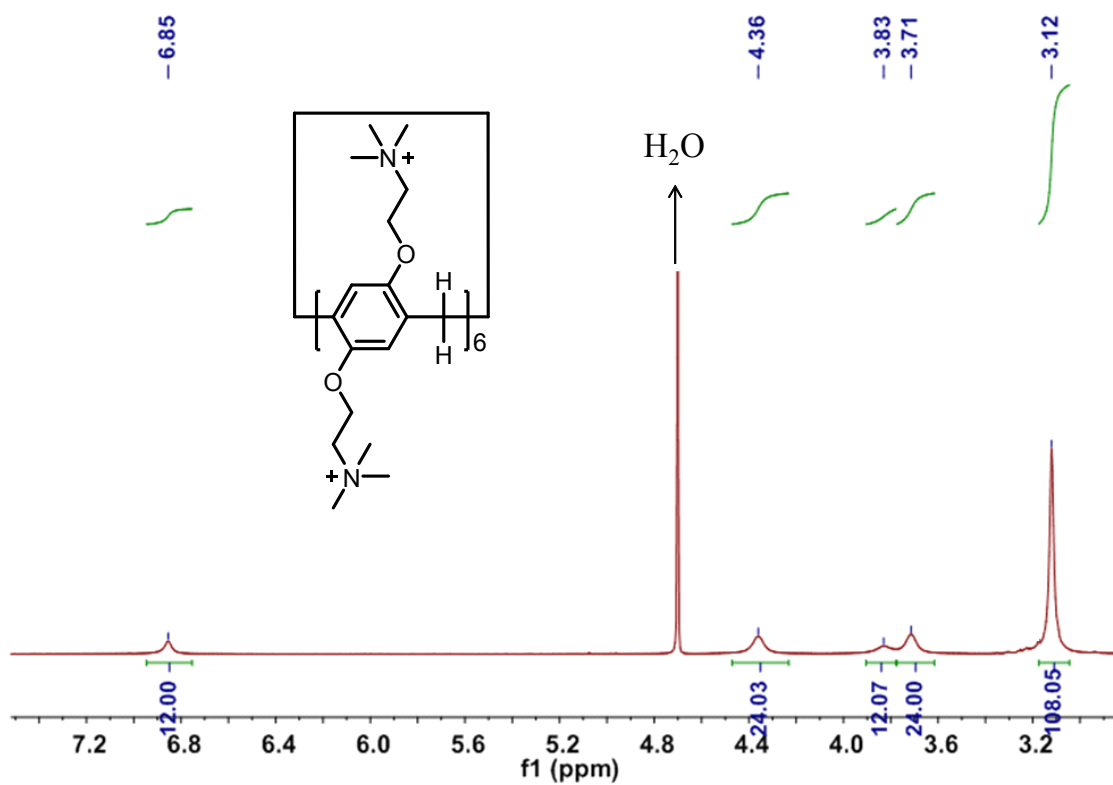

**Fig. S4**  $^1\text{H}$  NMR spectrum (400 MHz,  $\text{CDCl}_3$ , rt) of **WP6**.

## 2.2 Synthesis of AP6

Scheme S1. Synthesis route to AP6

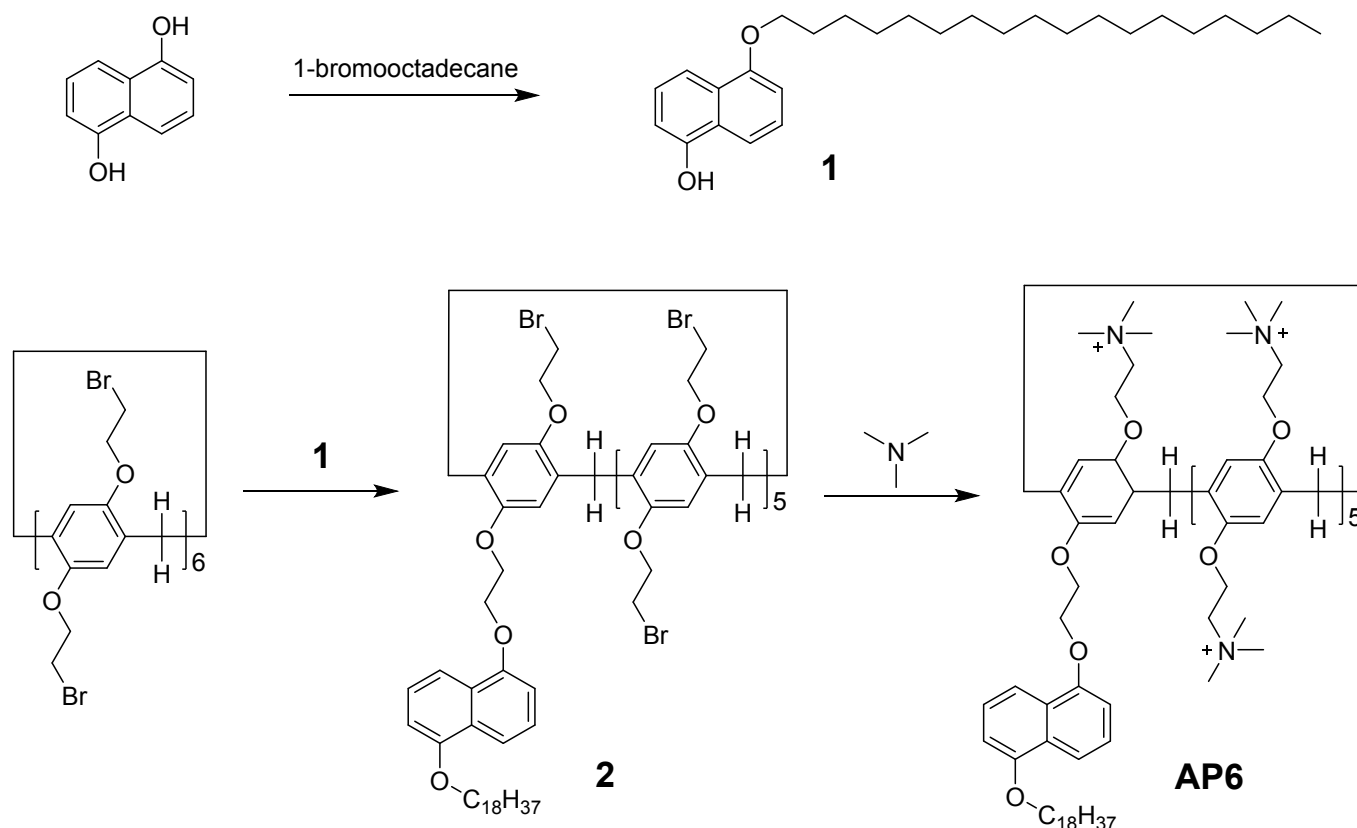

Anhydrous potassium carbonate (27.6 g, 200 mmol) was added to a solution of 1,5-dihydroxy-naphthalene (16.0 g, 100 mmol) and 1-bromooctadecane (33.3 g, 100 mmol) in dry acetonitrile (500 mL) under vigorous stirring. The mixture was stirred at 80 °C for 24 hours under nitrogen. After removal of the inorganic salt, the solvent was evaporated and the residue was purified by chromatography on silica gel (petroleum ether/ethyl acetate, 100:1) to give **1** as a white solid. The yield of **1** was 75%. The melting point of **1** is 61.0 °C. The  $^1\text{H}$  NMR spectrum of **1** is shown in Fig. S5.  $^1\text{H}$  NMR (400 MHz,  $\text{CDCl}_3$ , 293 K)  $\delta$  (ppm): 7.76 (d,  $J = 4.0$  Hz, 1H), 7.62 (d,  $J = 4$  Hz, 1H), 7.26 (t,  $J = 6$  Hz, 1H), 7.21 (d,  $J = 6$  Hz, 1H), 6.38–6.22 (m, 2H), 5.17 (s, 1H), 4.14 (t,  $J = 4$  Hz, 2H), 1.86–1.84 (m, 2H), 1.56–1.32 (m, 30H), 0.95 (t,  $J = 4$  Hz, 3H).<sup>S3</sup>

Anhydrous potassium carbonate (5.52 g, 40 mmol) was added to a solution of **1** (4.12 g, 10.0 mmol) and **Br-P6** (16.8 g, 8.33 mmol) in dry acetonitrile (250 mL) under vigorous stirring. The mixture was stirred at 80 °C for 24 hours. After removal of the inorganic salt, the solvent was evaporated and the residue was purified by chromatography on silica gel (petroleum ether/ethyl acetate, 10:1) to give the crude product as a white solid. A mixture of the crude product with excess trimethylamine (30 equiv) were dissolved in ethanol and refluxed for 24 h. The solvent was evaporated, and the residue was poured into CHCl<sub>3</sub> and stirred. The solution was extracted with water (3 × 100 mL), and the aqueous phase was obtained. The white solid **AP6** was isolated after evaporation of the solution. The melting point of **1** is 135.2 °C. The <sup>1</sup>H NMR spectrum of **AP6** is shown in Fig. S6. <sup>1</sup>H NMR (400 MHz, DMSO-*d*<sub>6</sub>, 293 K) δ (ppm): 7.94 (t, *J* = 8 Hz, 2H), 7.40–7.35 (m, 2H), 6.99 (s, 1H), 6.94–6.86 (m, 12H), 6.78 (s, 1H), 4.52 (s, 2H), 4.27 (s, 2H), 4.24–4.13 (m, 22H), 4.12–3.84 (m, 12H), 3.66–3.62 (m, 22H), 3.07 (t, *J* = 4 Hz, 2H), 2.27 (s, 99H), 1.92–1.91 (m, 2H), 1.26 (s, 32H), 0.89 (t, *J* = 8 Hz, 3H). The <sup>13</sup>C NMR spectrum of **AP6** is shown in Fig. S7. <sup>13</sup>C NMR (100 MHz, DMSO, 293 K) δ (ppm): 155.44, 154.62, 153.08, 150.27, 129.95, 128.55, 126.47, 125.47, 124.25, 117.31, 116.98, 115.66, 113.75, 111.40, 109.81, 71.79, 70.10, 69.11, 68.53, 68.12, 68.03, 67.84, 66.44, 64.69, 54.69, 40.70, 31.62, 28.93, 26.46, 22.91, 13.99. LRESIMS is shown in Fig. S8: *m/z* 1418.3 [M – 2Br]<sup>2+</sup>. HRESIMS *m/z* calcd for [M – 2Br]<sup>2+</sup> C<sub>127</sub>H<sub>214</sub>O<sub>14</sub>N<sub>11</sub>Br<sub>9</sub><sup>2+</sup>, 1418.4481; found 1418.4479; error –0.14 ppm.

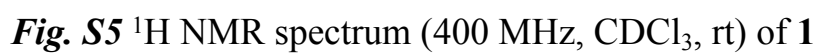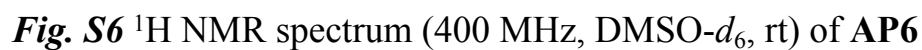



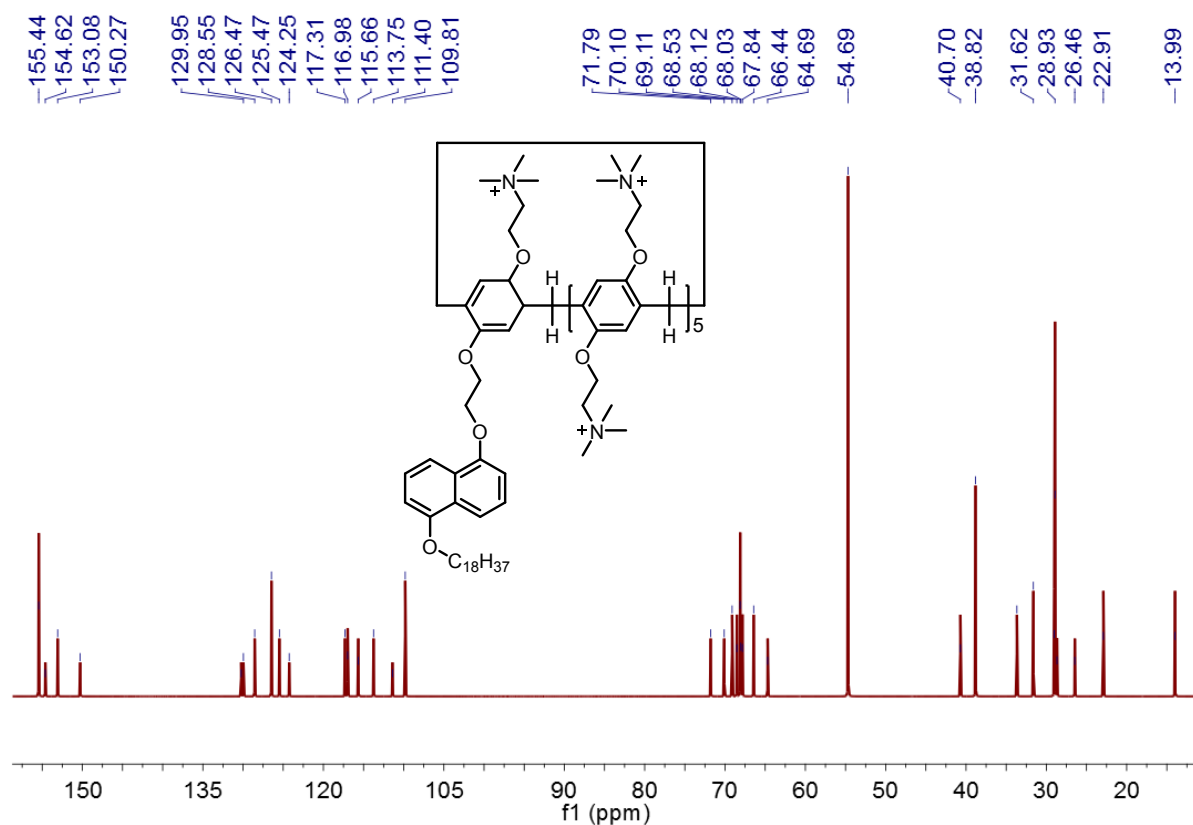

**Fig. S7**  $^{13}\text{C}$  NMR spectrum (100 MHz, DMSO, rt) of AP6

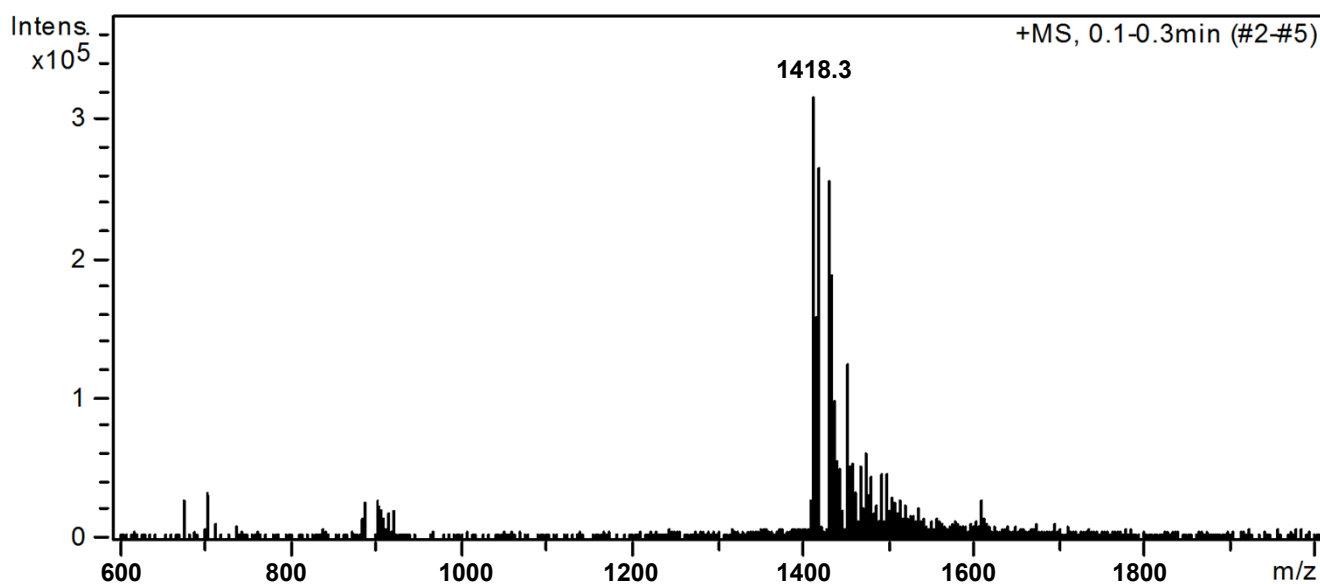

**Fig. S8** Electrospray ionization mass spectrum of AP6. Assignment of the main peak:  $m/z$  1418.3  $[\text{M} - 2\text{Br}]^{2+}$ .

### 3. Self-assembly of **AP6** in water

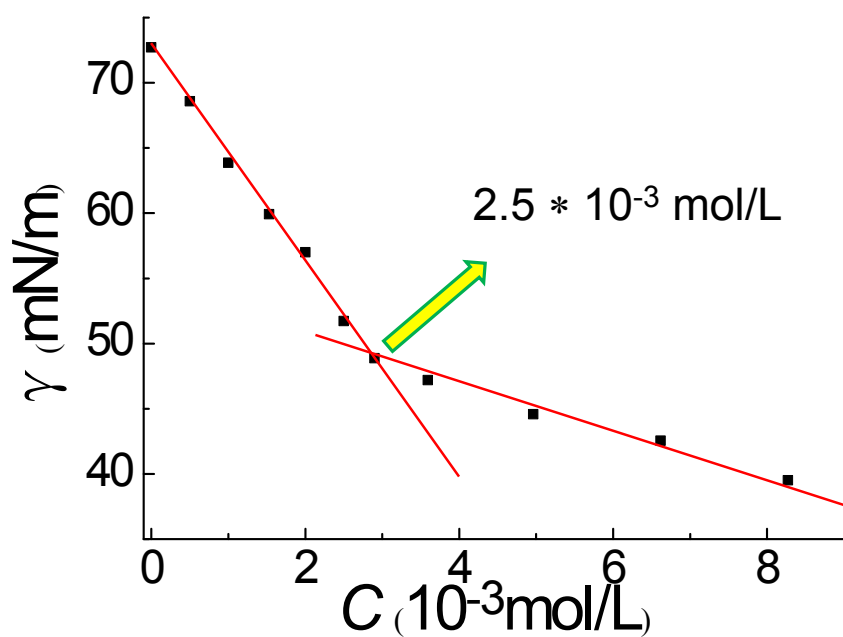

**Fig. S9** CAC value of the **AP6** in water

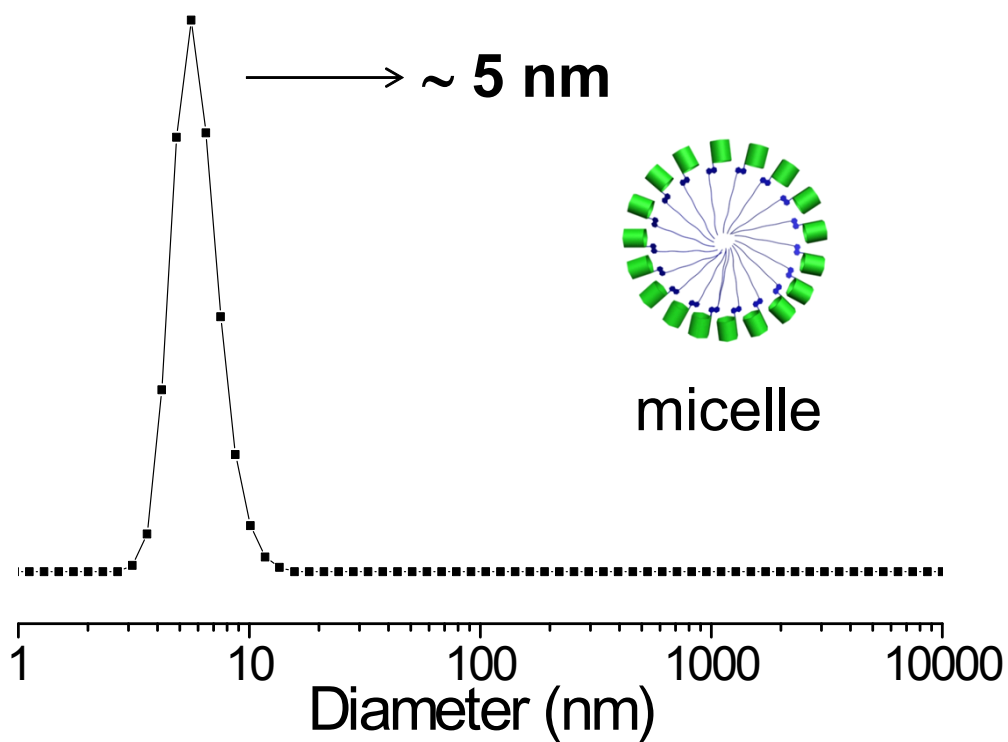

**Fig. S10** DLS study of **AP6** in water. (The concentration of **AP6** was  $3.00 \times 10^{-3}$  mol/L)

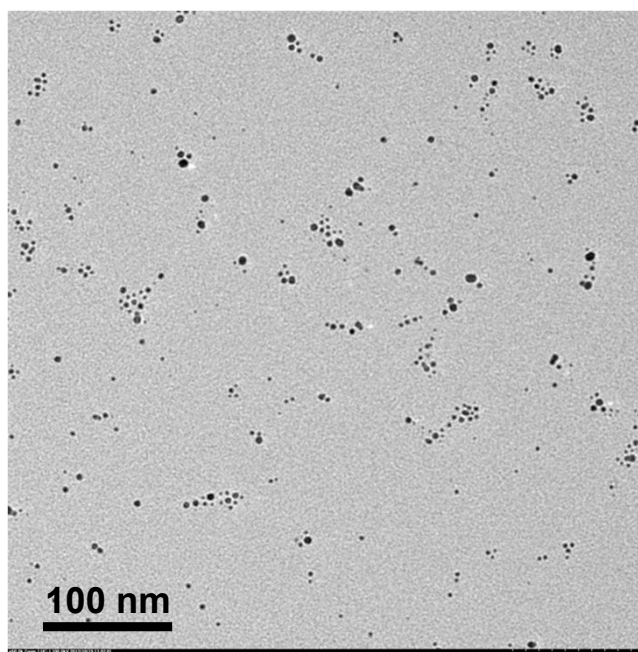

**Fig. S11** TEM image of **AP6** self-assembly in water.

#### 4. Host-guest interaction between *ATP* and *WP6*

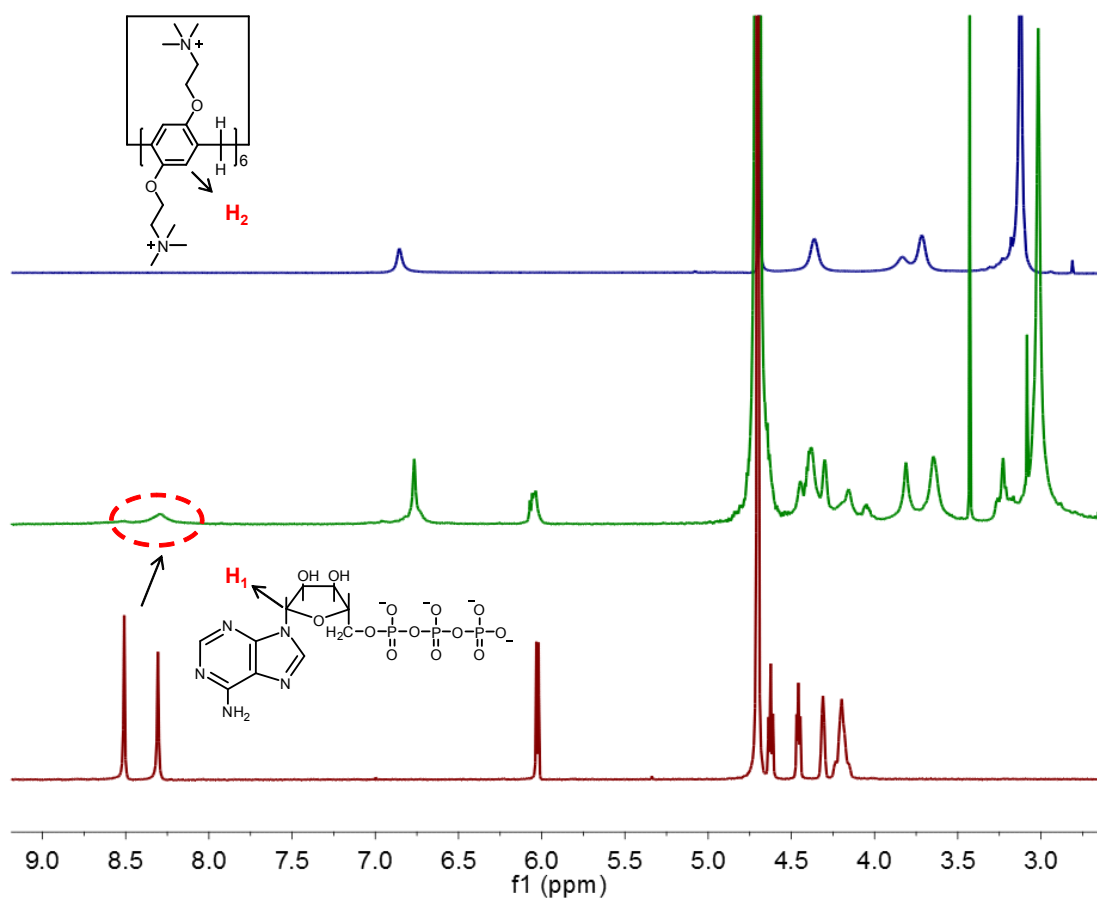

**Fig. S12**  $^1\text{H}$  NMR spectra (400 MHz,  $\text{D}_2\text{O}$ ) of **WP6**, **WP6 $\supset$ ATP**, and **ATP**.

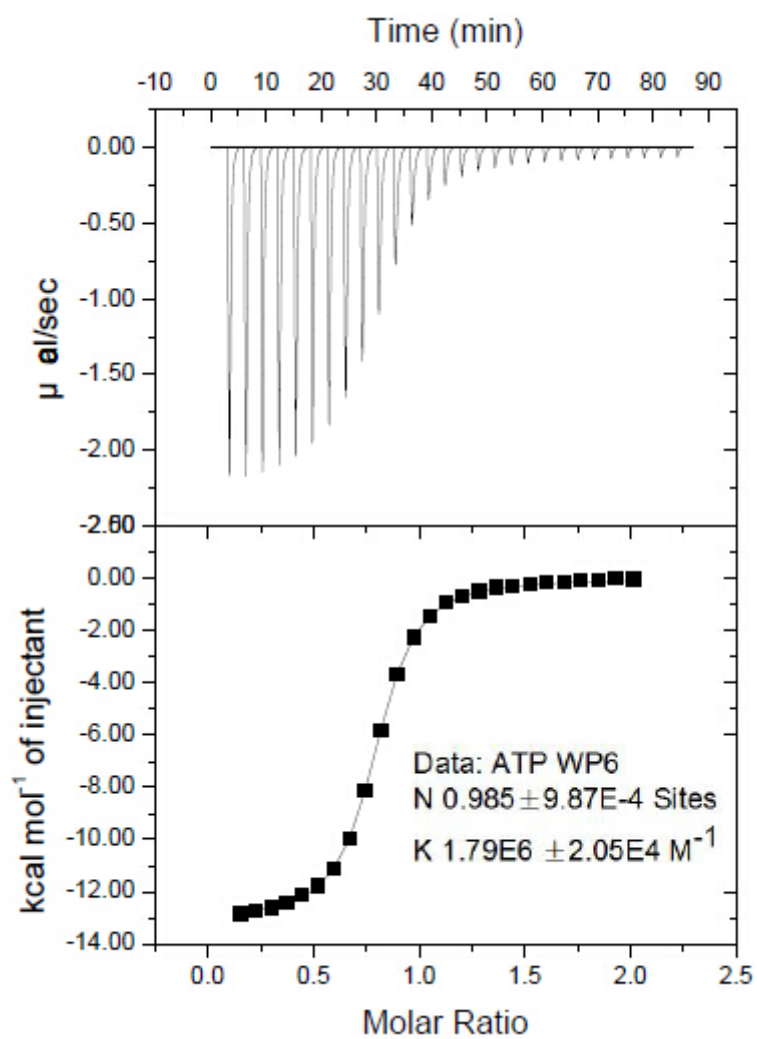

**Fig. S13** ITC studies of WP6⊃ATP.

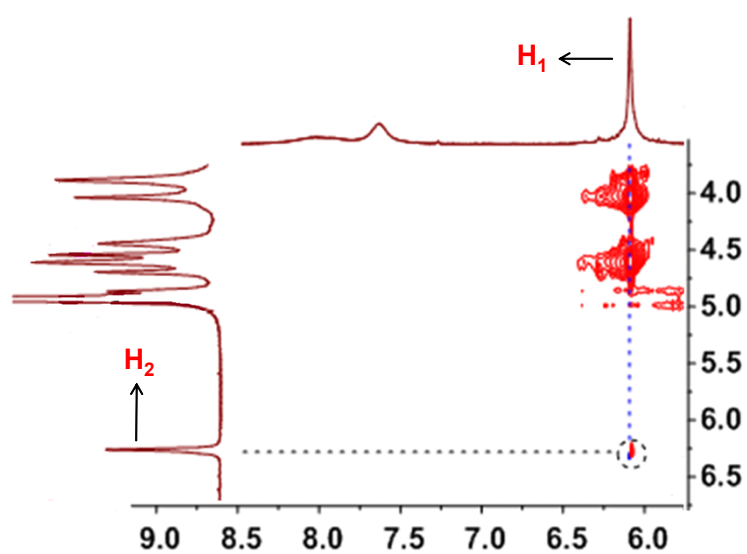

**Fig. S14** 2D NOESY NMR spectrum of WP6⊃ATP.

## 5. Self-assembly of **AP6** $\rightarrow$ **ATP** in water

**Fig. S15** DLS study of **AP6** in water. (The concentration of **AP6** was  $5.00 \times 10^{-5}$  mol/L)

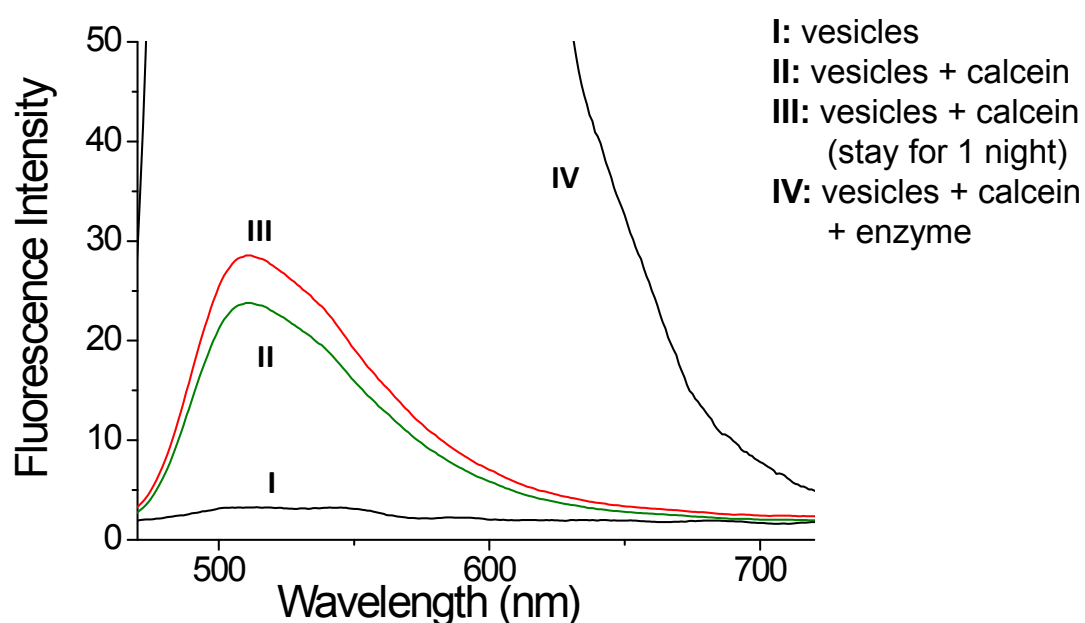

**Fig. S16** Enlarged picture of Fig. 3b. (The fluorescence intensity of **AP6** vesicles was very weak, when calcein was encapsulated into the vesicles, the fluorescence intensity become a little strong, after 1 night, the fluorescence intensity was similar to 1 night before, which indicate the vesicles are stable, however, after adding an enzyme, the fluorescence intensity become very strong, which indicate that calcein released from the vesicles. )

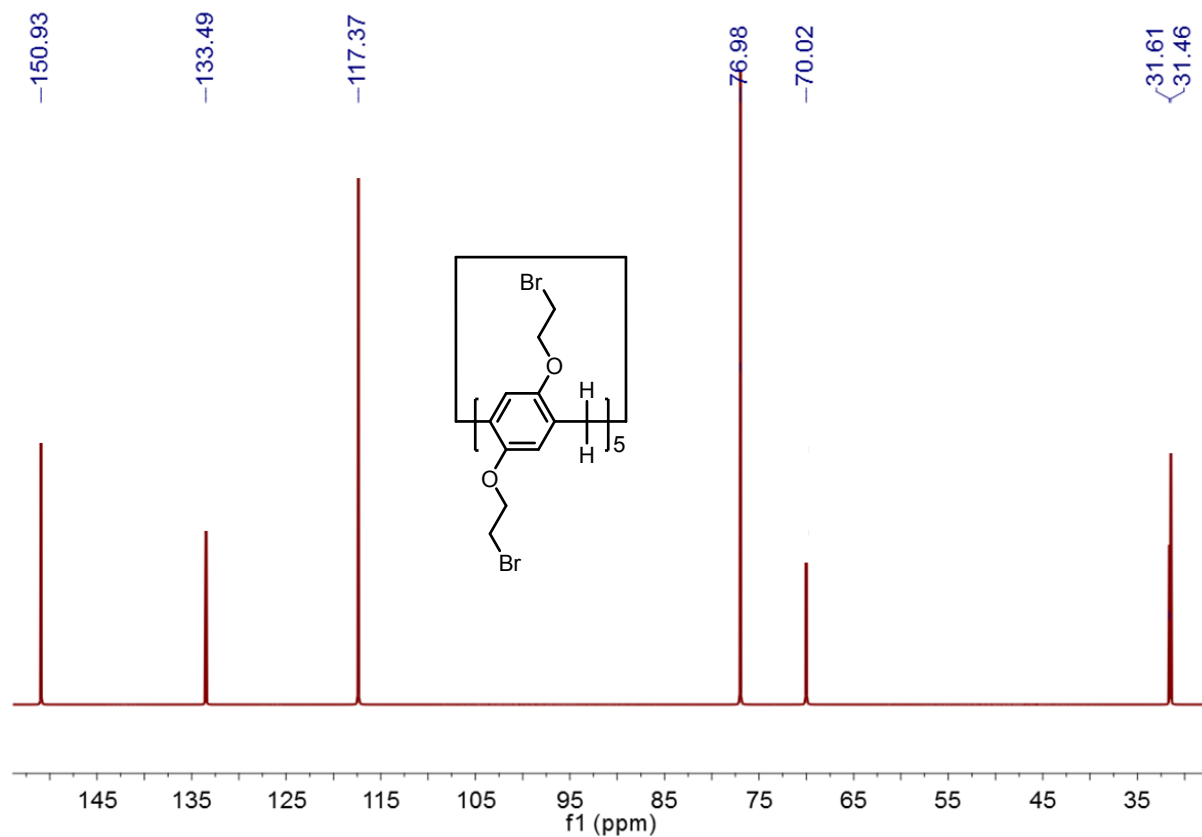

**Fig. S17**  $^{13}\text{C}$  NMR spectrum (100 MHz, DMSO, rt) of **Br-P5**.

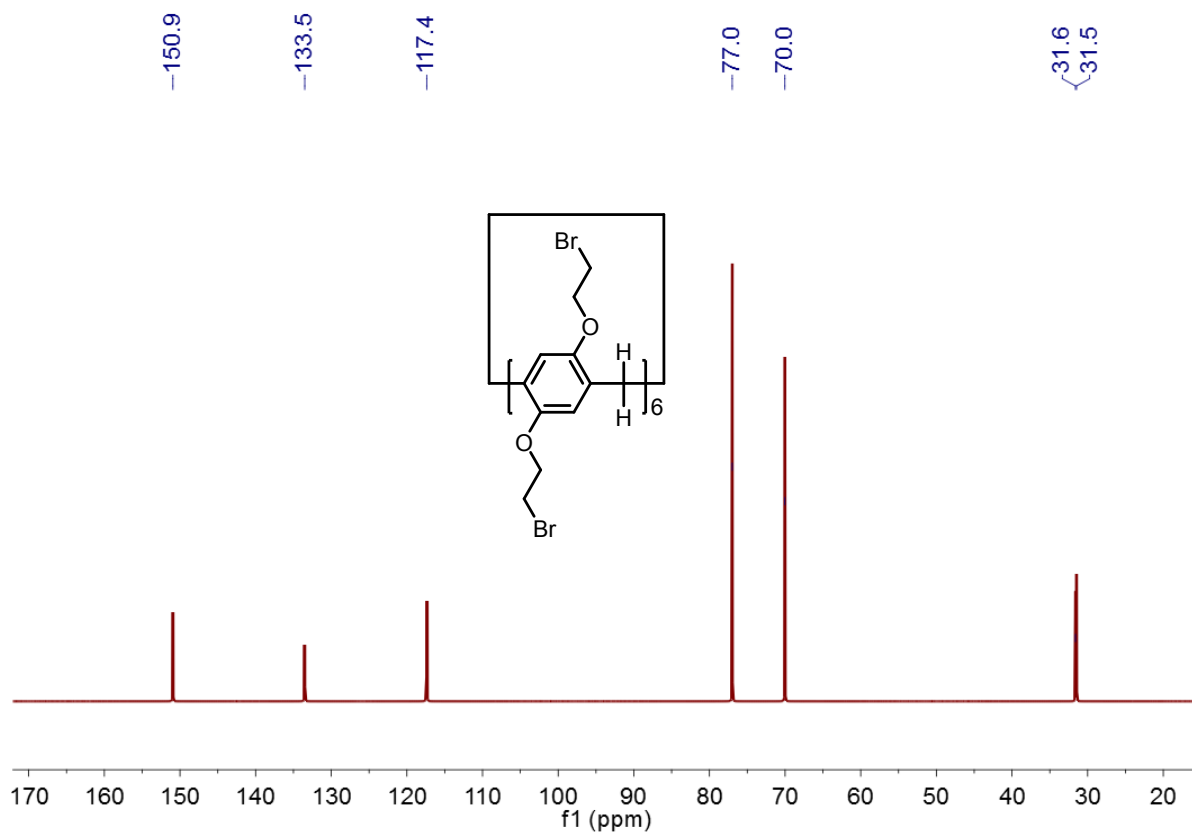

**Fig. S18**  $^{13}\text{C}$  NMR spectrum (100 MHz, DMSO, rt) of **Br-P6**.

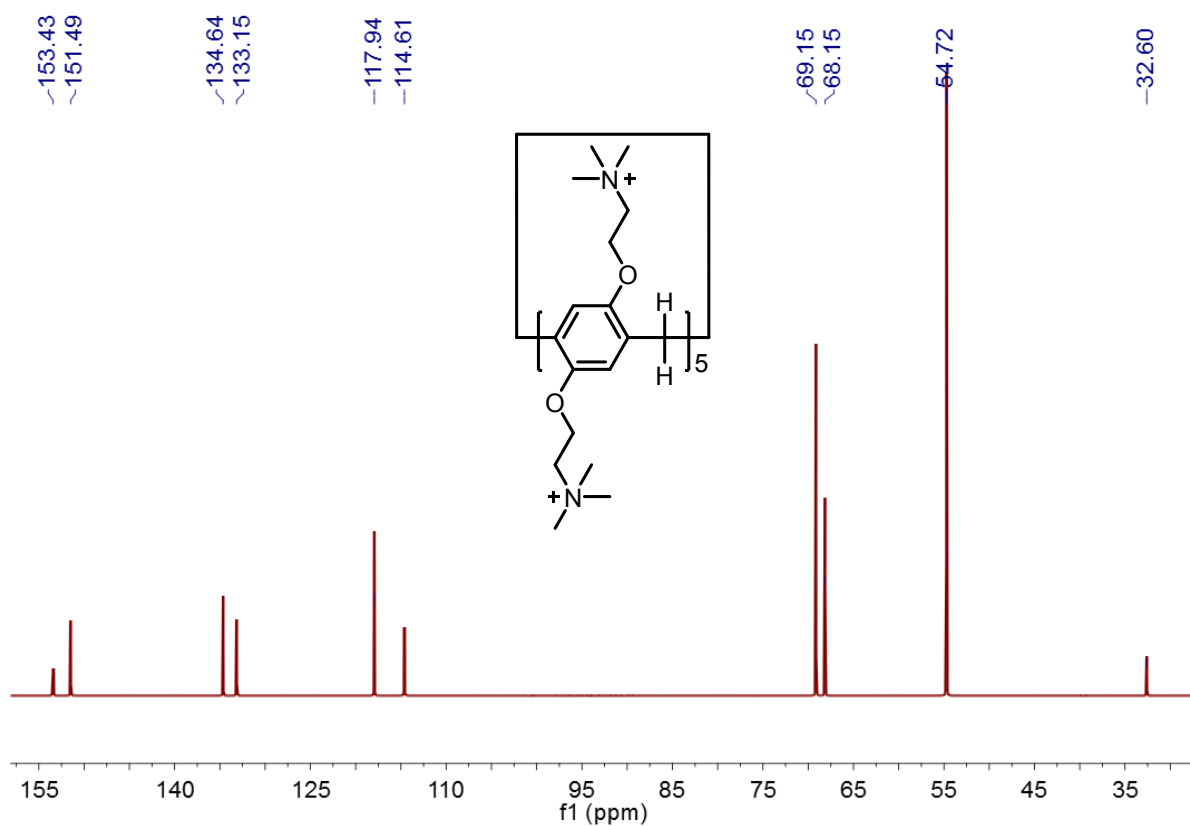

**Fig. S19** <sup>13</sup>C NMR spectrum (100 MHz, DMSO, rt) of **WP5**.

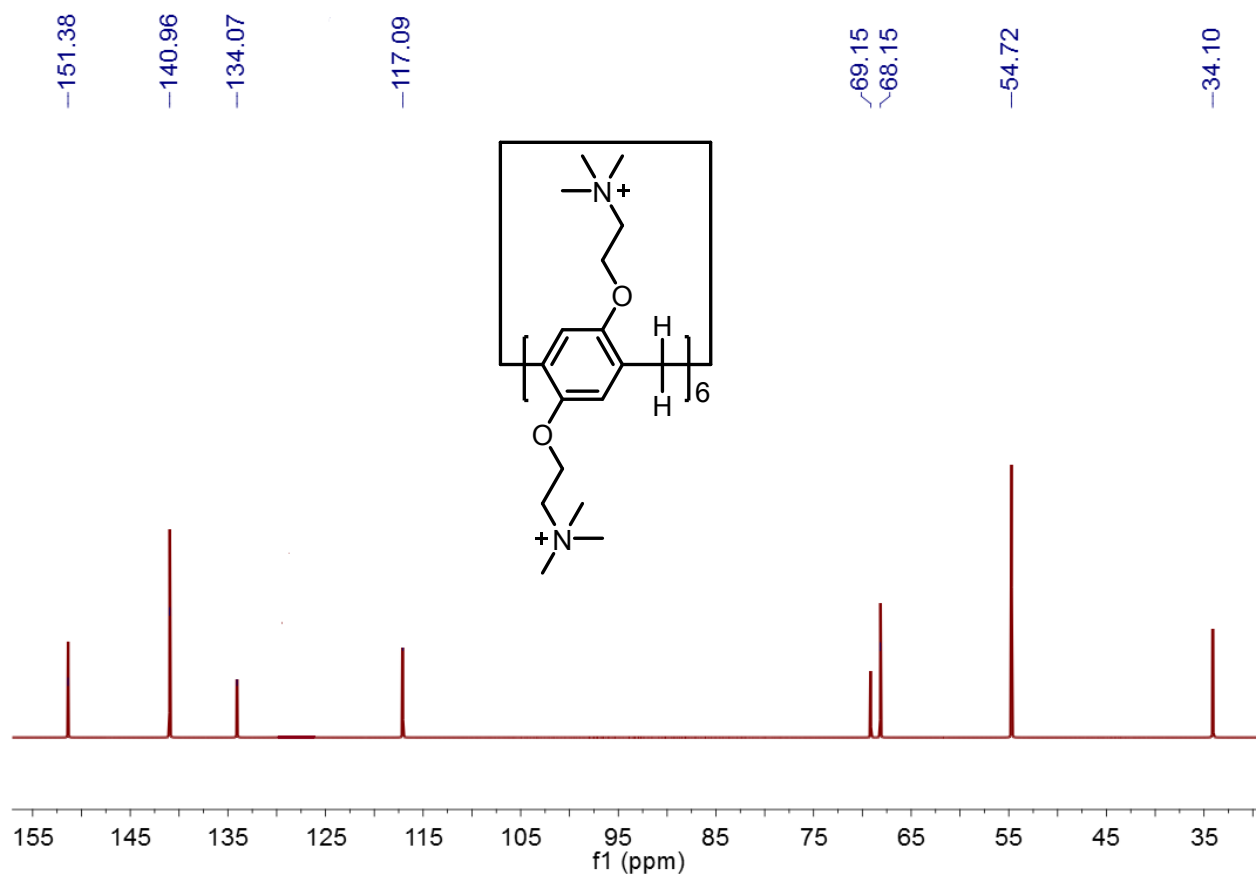

**Fig. S20** <sup>13</sup>C NMR spectrum (100 MHz, DMSO, rt) of **WP6**.

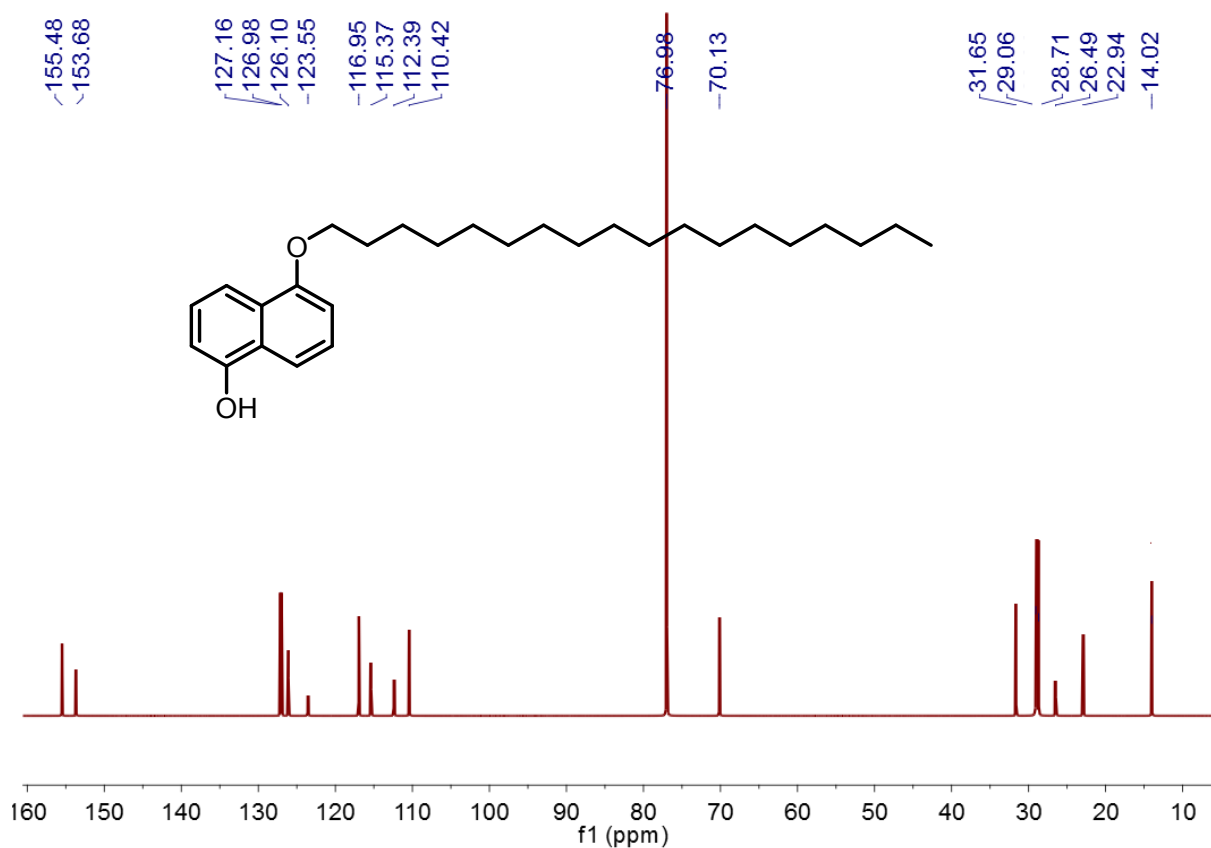

**Fig. S21** <sup>13</sup>C NMR spectrum (100 MHz, DMSO, rt) of **1**.

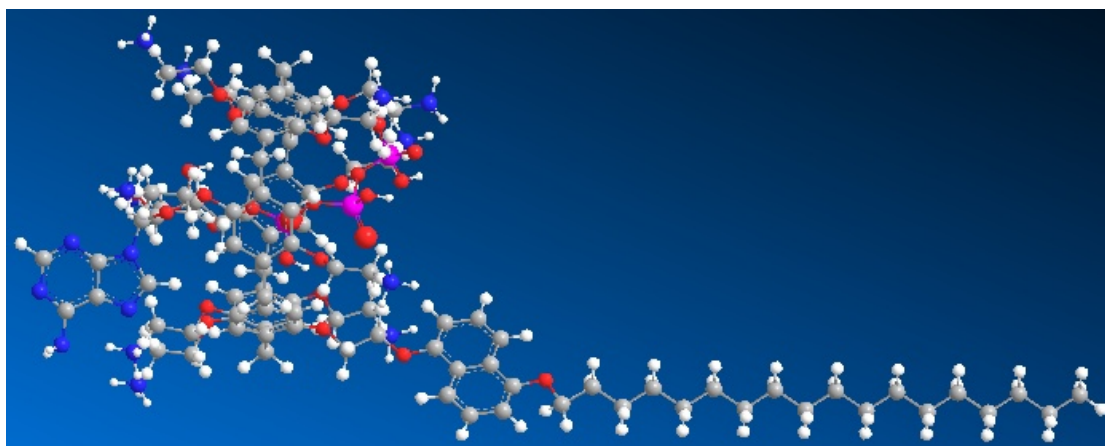

**Fig. S22** Energy-minimized structure of **AP6⊃ATP**

## 6. References

- S1. Y. Yao, J. Li, J. Dai, X. Chi and M. Xue, *RSC Adv.*, 2014, **4**, 9039.
- S2. Y. Yao, K. Jie, Y. Zhou and M. Xue, *Tetrahedron Lett.*, 2014, **55**, 3195.
- S3. K. Jie, Y. Yao, X. Chi and F. Huang, *Chem. Commun.*, 2014, **50**, 5503.
